# Supplementary material for: Biodiesel Processing Using Sodium and Potassium Geopolymer Powders as Heterogeneous Catalysts
Source: PubMed Central journal article supplement (PMC7356640; doi:10.3390/molecules25122839), 2020-06-19

*Supplementary Material*

# **Biodiesel Processing Using Sodium and Potassium Geopolymer Powders as Heterogeneous Catalysts**

**Renata F. Botti** <sup>1,\*</sup>, **Murilo D.M. Innocentini** <sup>2</sup>, **Thais A. Faleiros** <sup>2</sup>, **Murilo F. Mello** <sup>2</sup>, **Danilo L. Flumignan** <sup>3,4</sup>, **Leticia K. Santos** <sup>3</sup>, **Giorgia Franchin** <sup>1</sup> and **Paolo Colombo** <sup>1,5</sup>

<sup>1</sup> Department of Industrial Engineering, University of Padova, via Marzolo 9, 35131 Padova, Italy; giorgia.franchin@unipd.it (G.F.); paolo.colombo@unipd.it (P.C.)

<sup>2</sup> Course of Chemical Engineering, University of Ribeirão Preto (UNAERP), 14096-900 Ribeirão Preto, São Paulo, Brazil; minnocentini@unaerp.br (M.D.M.I.); thaisfaleiros1999@hotmail.com (T.A.F.); murilofmello@hotmail.com (M.F.M.)

<sup>3</sup> Institute of Chemistry, Center for Monitoring and Research of the Quality of Fuels, Biofuels, Crude Oil and Derivatives–CEMPEQC, São Paulo State University (UNESP), 14800-900 Araraquara, São Paulo, Brazil; flumignan@ifsp.edu.br (D.L.F.); leticiaksantos@yahoo.com (L.K.S.)

<sup>4</sup> Mato Grosso Federal Institute of Education, Science and Technology-Campus Cuiabá, Rua Profa. Zulmira Canavarros, 95, Centro, 78005-200 Cuiabá, Mato Grosso, Brazil

<sup>5</sup> Department of Materials Science and Engineering, The Pennsylvania State University, University Park, PA 16802, USA

\* Correspondence: renata.botti@unipd.it; Tel.: +39 049 8275513

**Figure S1.** Chromatogram profiles of Mono (1 and 2); Di (3 and 4); Triglycerides (5) obtained through ABNT NBR 15908 in biodiesel yields with sodium geopolymers treated at different temperatures.

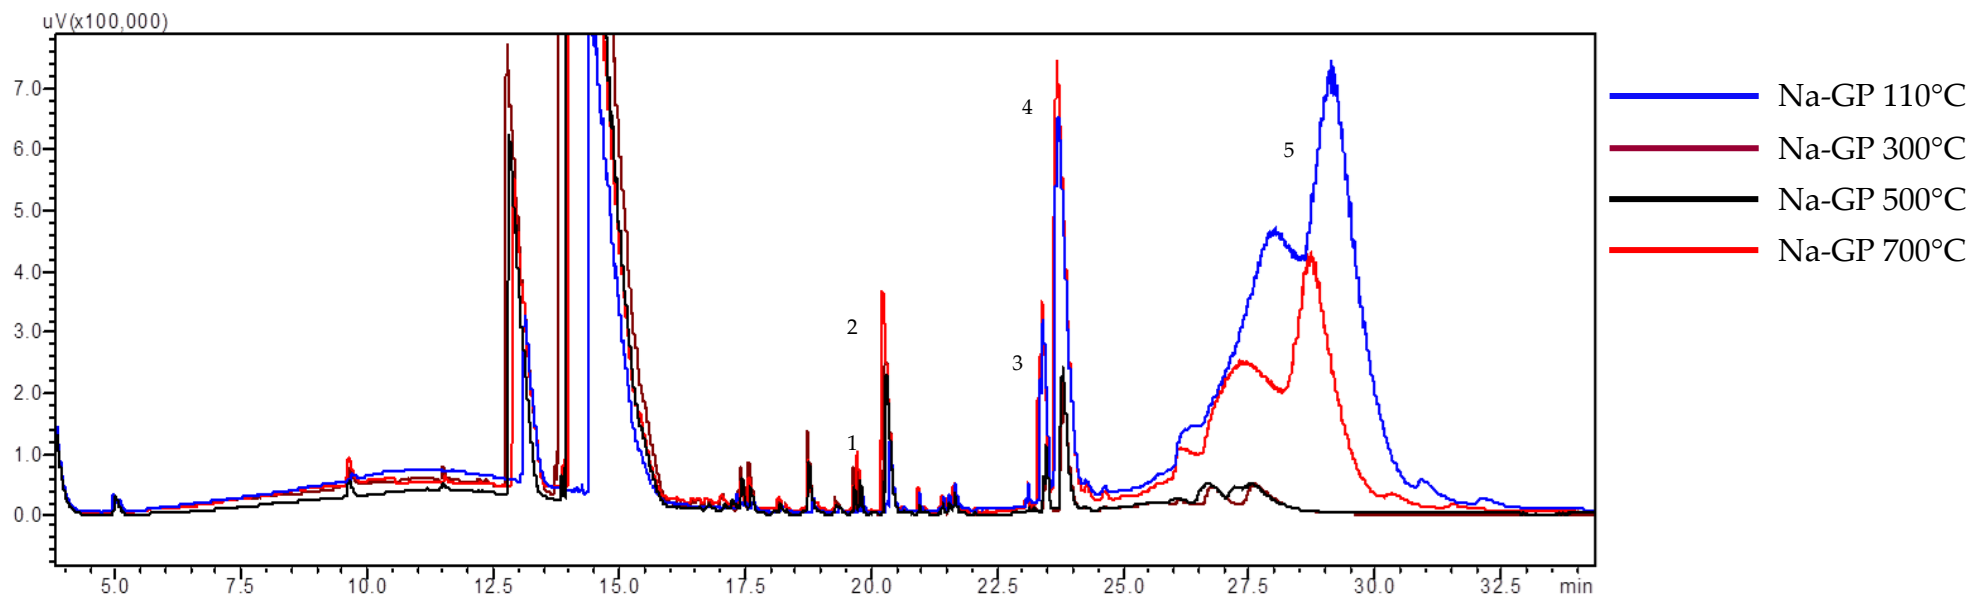

**Figure S2.** Chromatogram profiles of Mono (1 and 2); Di (3 and 4); Triglycerides (5) obtained through ABNT NBR 15908 in biodiesel yields with potassium geopolymer powders treated at different temperatures.

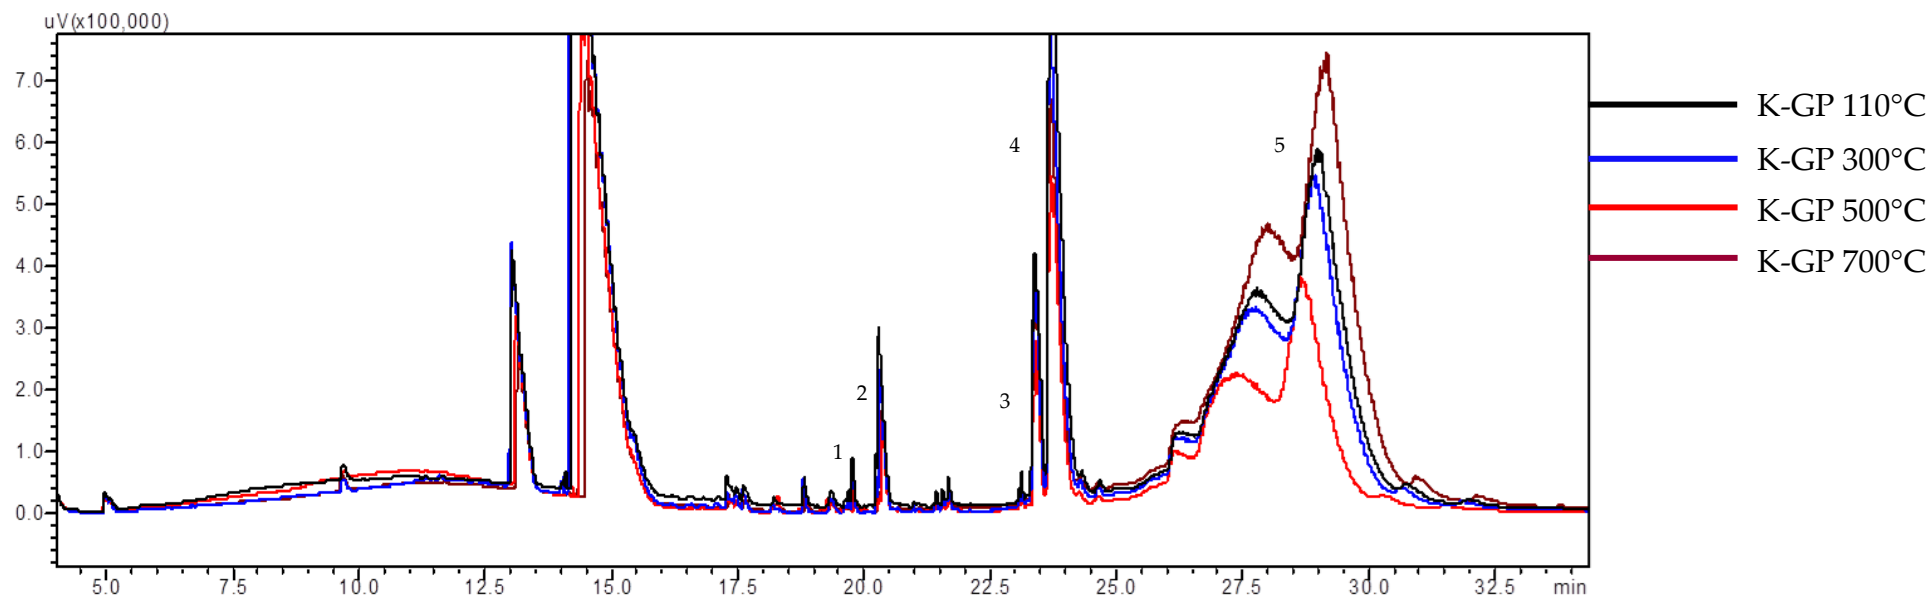

**Figure S3.** Chromatogram profile of biodiesel (FAMES) obtained through EN 14103 using with sodium geopolymer powders treated at different temperatures.

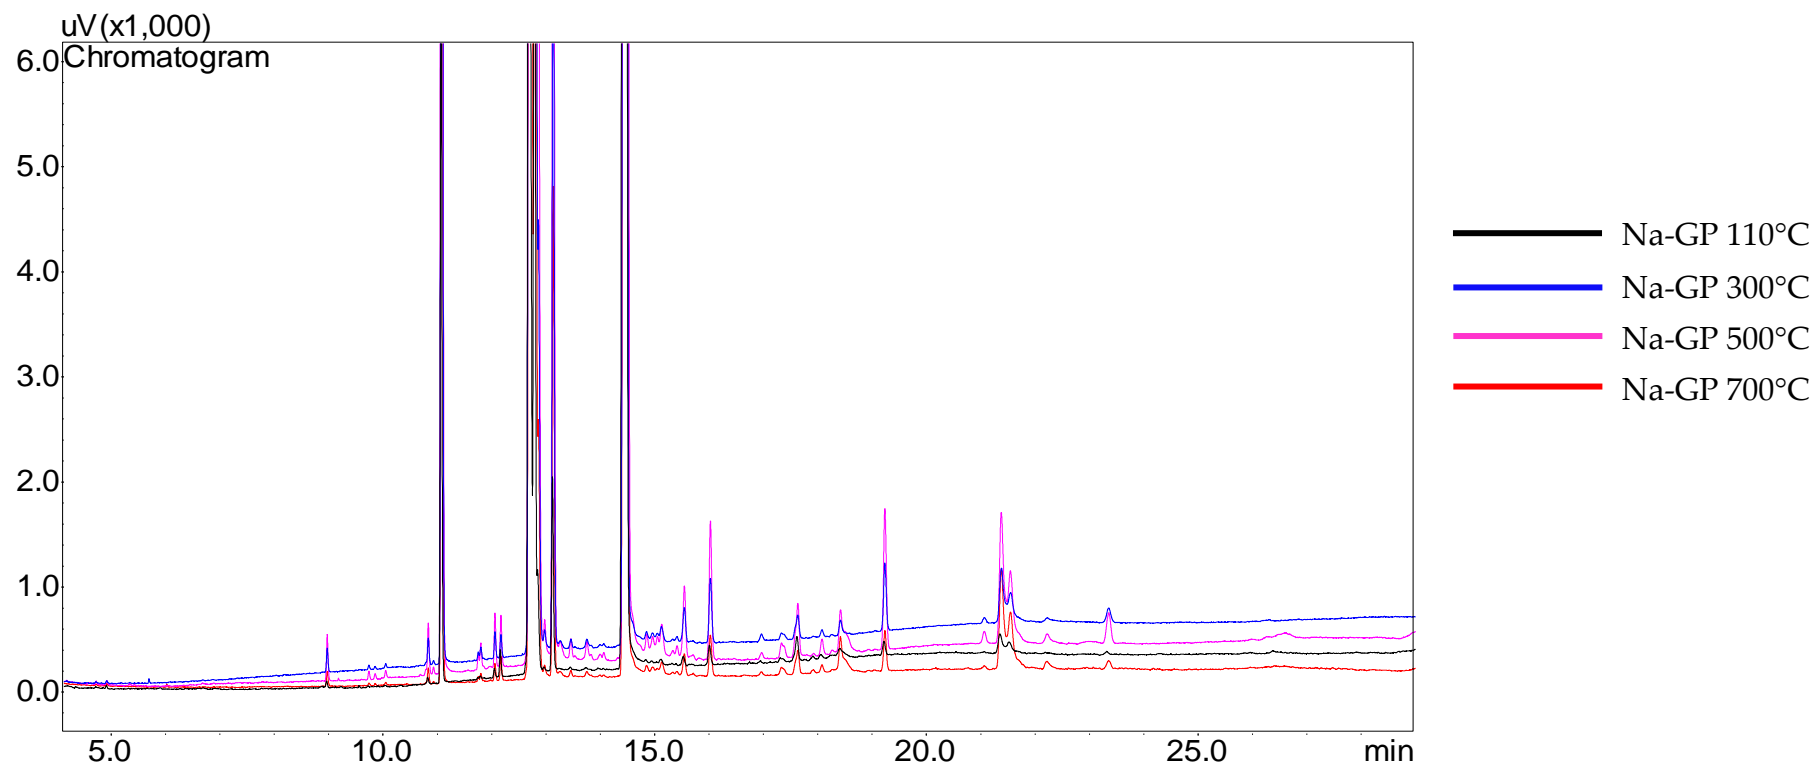

**Figure S4.** Chromatogram profile of biodiesel (FAMES) obtained through EN 14103 using with potassium geopolymer powders treated at different temperatures.

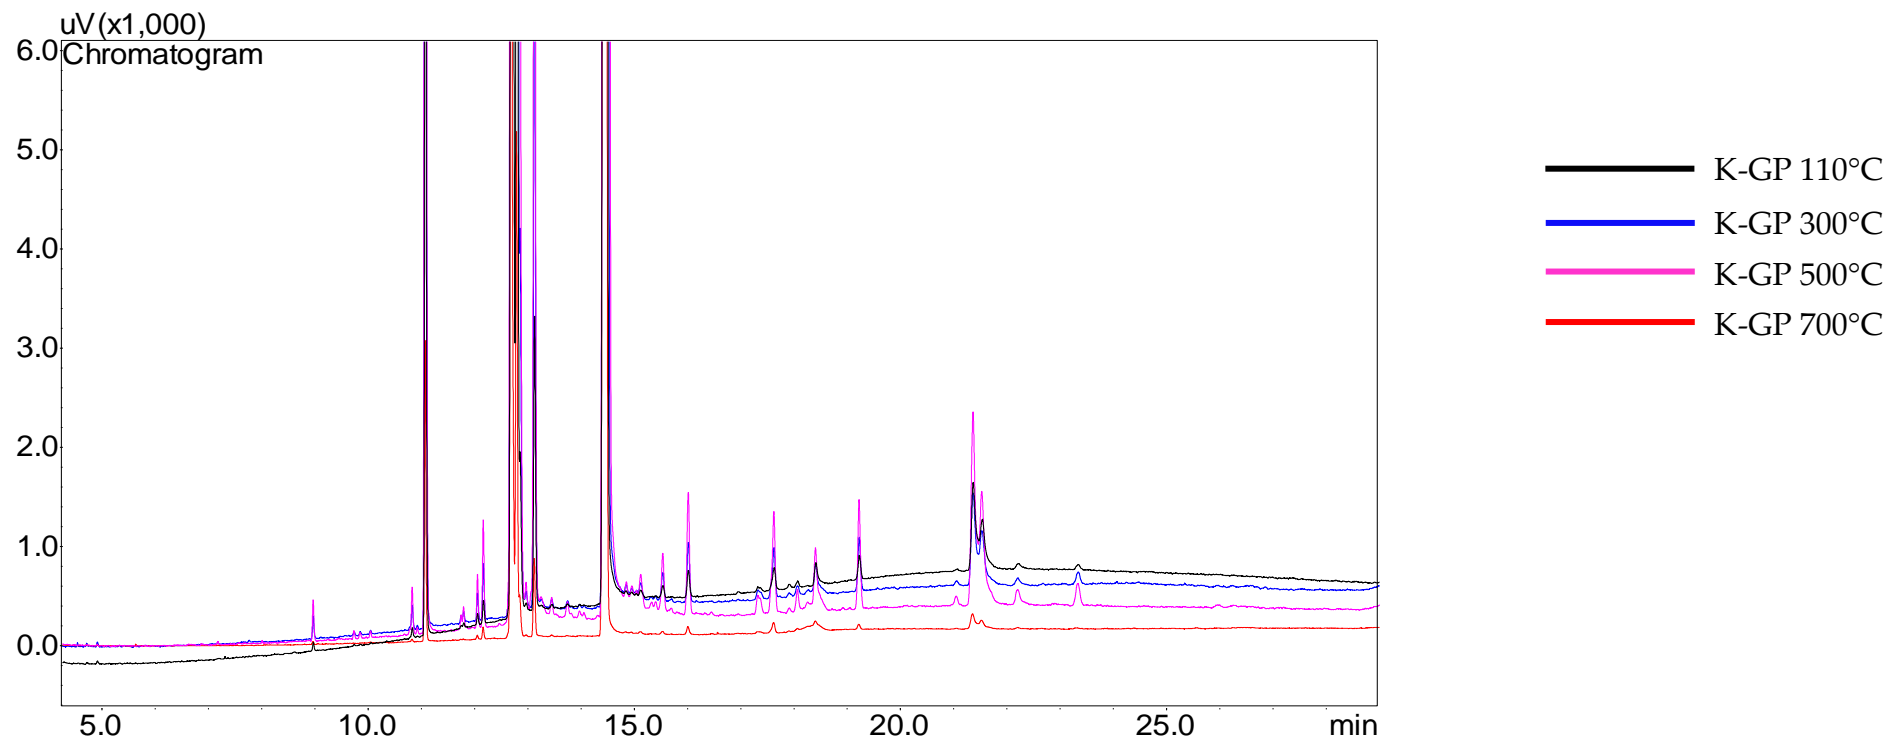

Supplement: molecules-25-02839-s001.pdf [file molecules-25-02839-s001.pdf]
